# Supplementary material for: Quantitative 3D OPT and LSFM datasets of pancreata from mice with streptozotocin-induced diabetes
Source: PubMed Central journal article supplement (PMC9464185; doi:10.1038/s41597-022-01546-5), 2022-09-10
Supplement: 41597_2022_1546_MOESM1_ESM.pdf [file 41597_2022_1546_MOESM1_ESM.pdf]

## Supplementary Figures

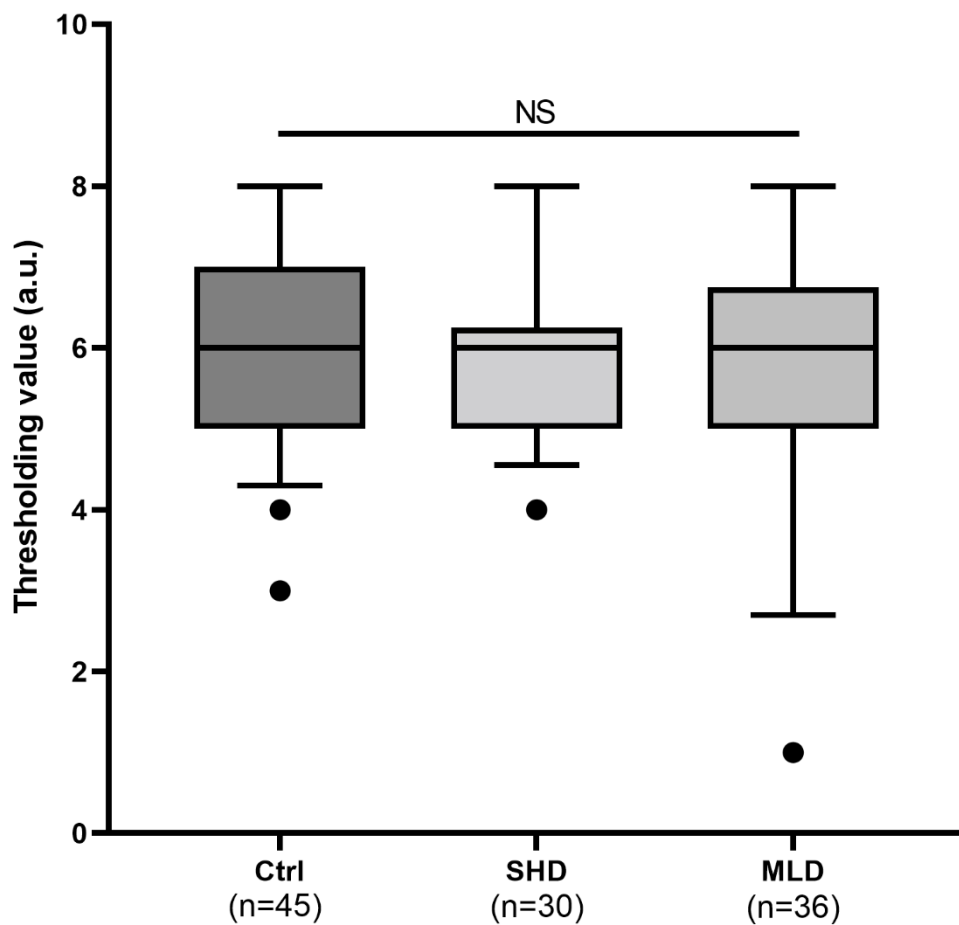

**Supplementary Figure 1: Box and whiskers graph depicting thresholding values based on islet volume segmentation for quantification in Imaris. Ctrl, SHD and MLD is not significantly different ( $p = 0.2524$  using a non-parametric one-way ANOVA (Kruskal-Wallis) test). Individual values can be found in Supplementary table 1 and 2.**
